# Supplementary material for: Outcomes of Peptide Vaccine GV1001 Treatment in a Murine Model of Acute Noise-Induced Hearing Loss
Source: PubMed Central journal article supplement (PMC7070461; doi:10.3390/antiox9020112), 2020-01-27

8 kHz

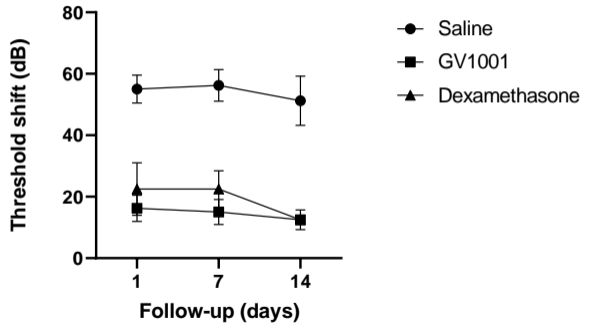

16 kHz

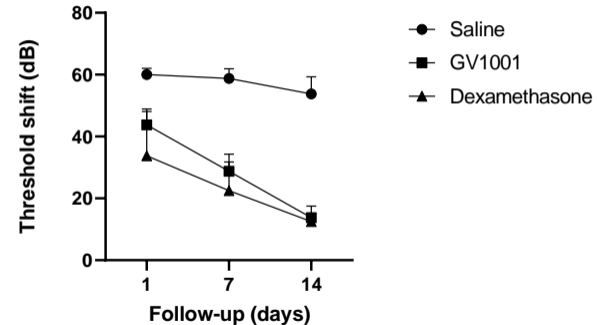

32 kHz

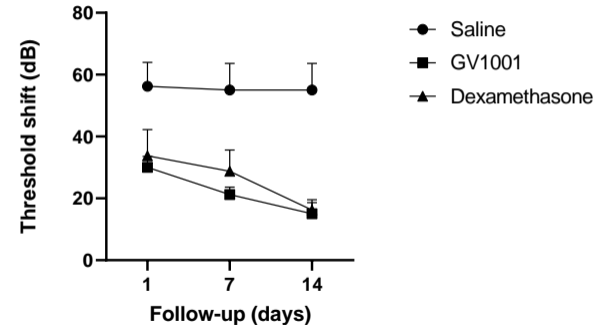

Supplement: antioxidants-09-00112-s001.pdf [file antioxidants-09-00112-s001.pdf]
